# Supplementary material for: Development of introgression lines of AA genome Oryza species, O. glaberrima, O. rufipogon, and O. nivara, in the genetic background of O. sativa L. cv. Taichung 65
Source: PubMed Central journal article supplement — Breed Sci. 2019 May 18;69(2):359–63. doi: 10.1270/jsbbs.19002 (PMC6711740; doi:10.1270/jsbbs.19002), 2019-05-18
Supplement: 69_19002_1.pdf [file 69_19002_1.pdf]

# WK1962ILs

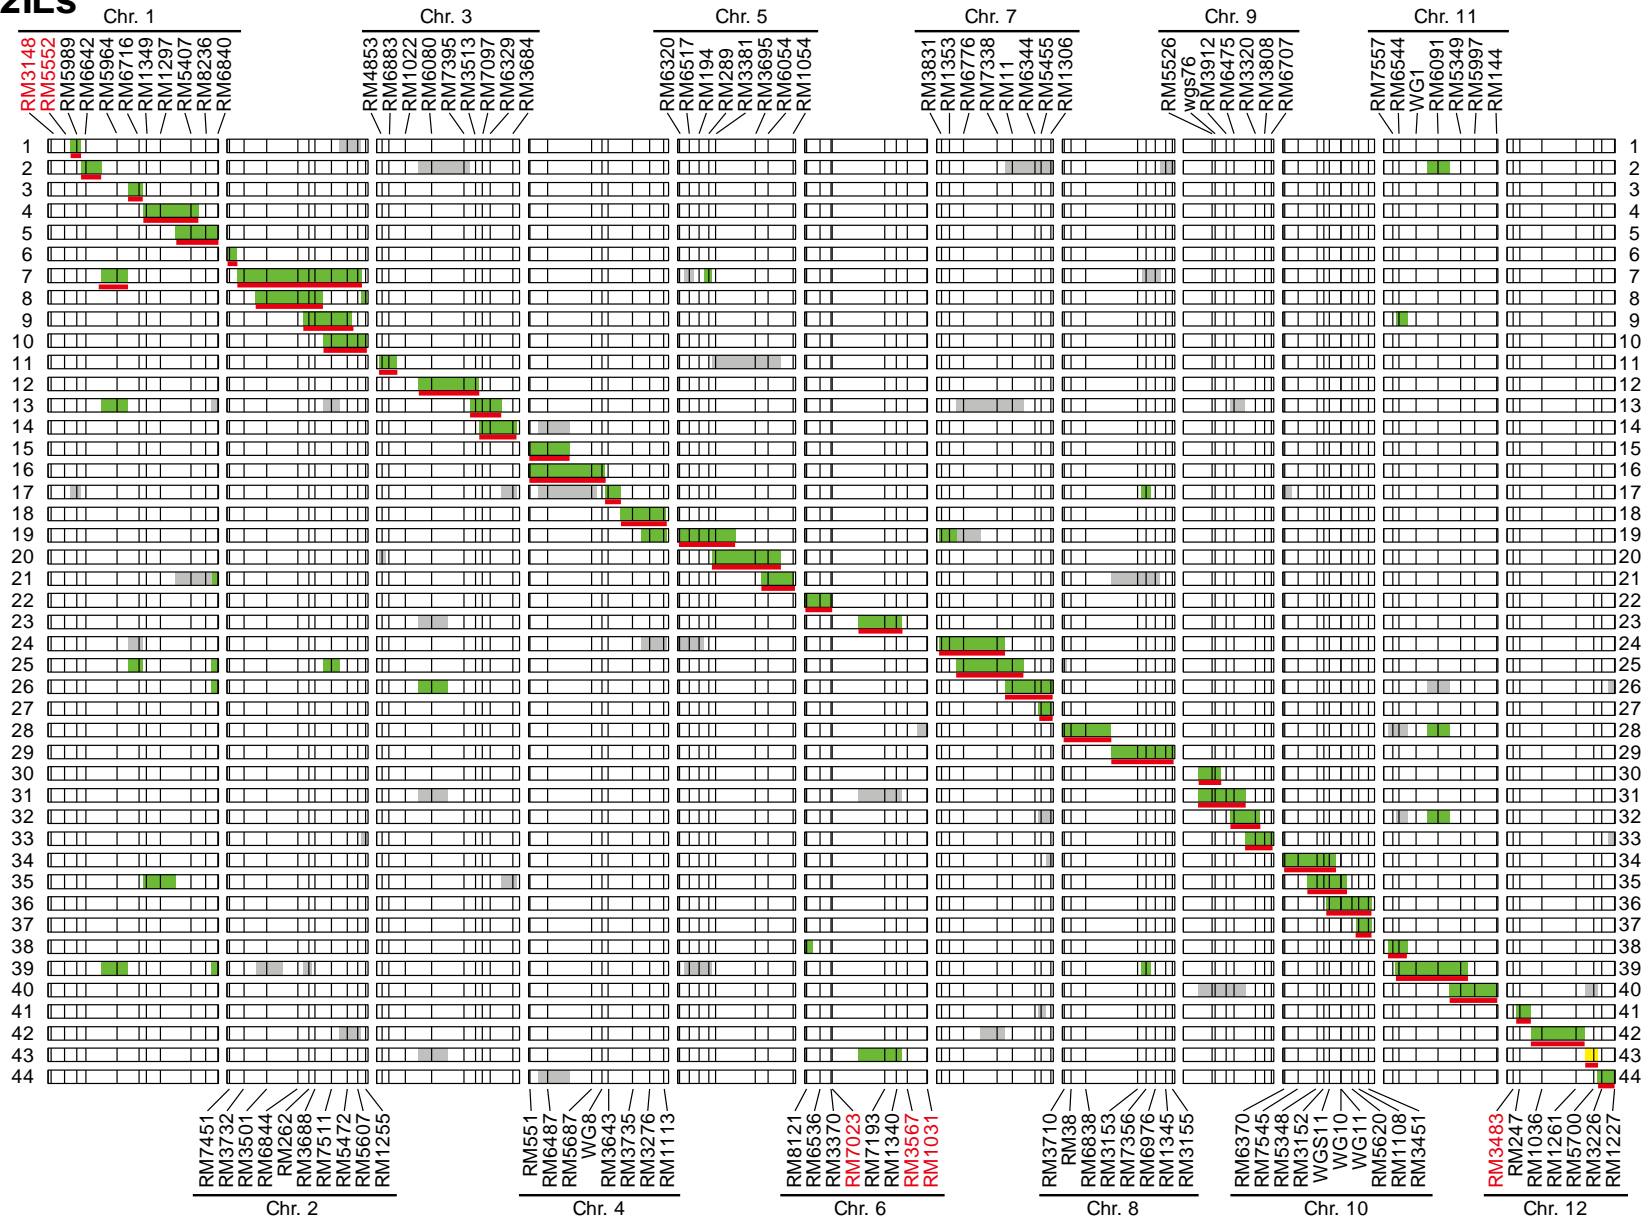

**Supplemental Fig. 2.** Graphical genotypes of WK1962ILs.

Homozygous genotypes for WK1962 or heterozygous genotypes were represented in green or yellow, respectively. Missing genotypes at markers showing heterozygous genotypes at BC<sub>4</sub>F<sub>1</sub> generation are indicated by grey. The chromosome region for a minimal set of introgression for alien chromosomes indicated in red underlines were target for population maintenances. Names of markers at which alien chromosomal segment was not introgressed were shown in red.

# WK56ILs

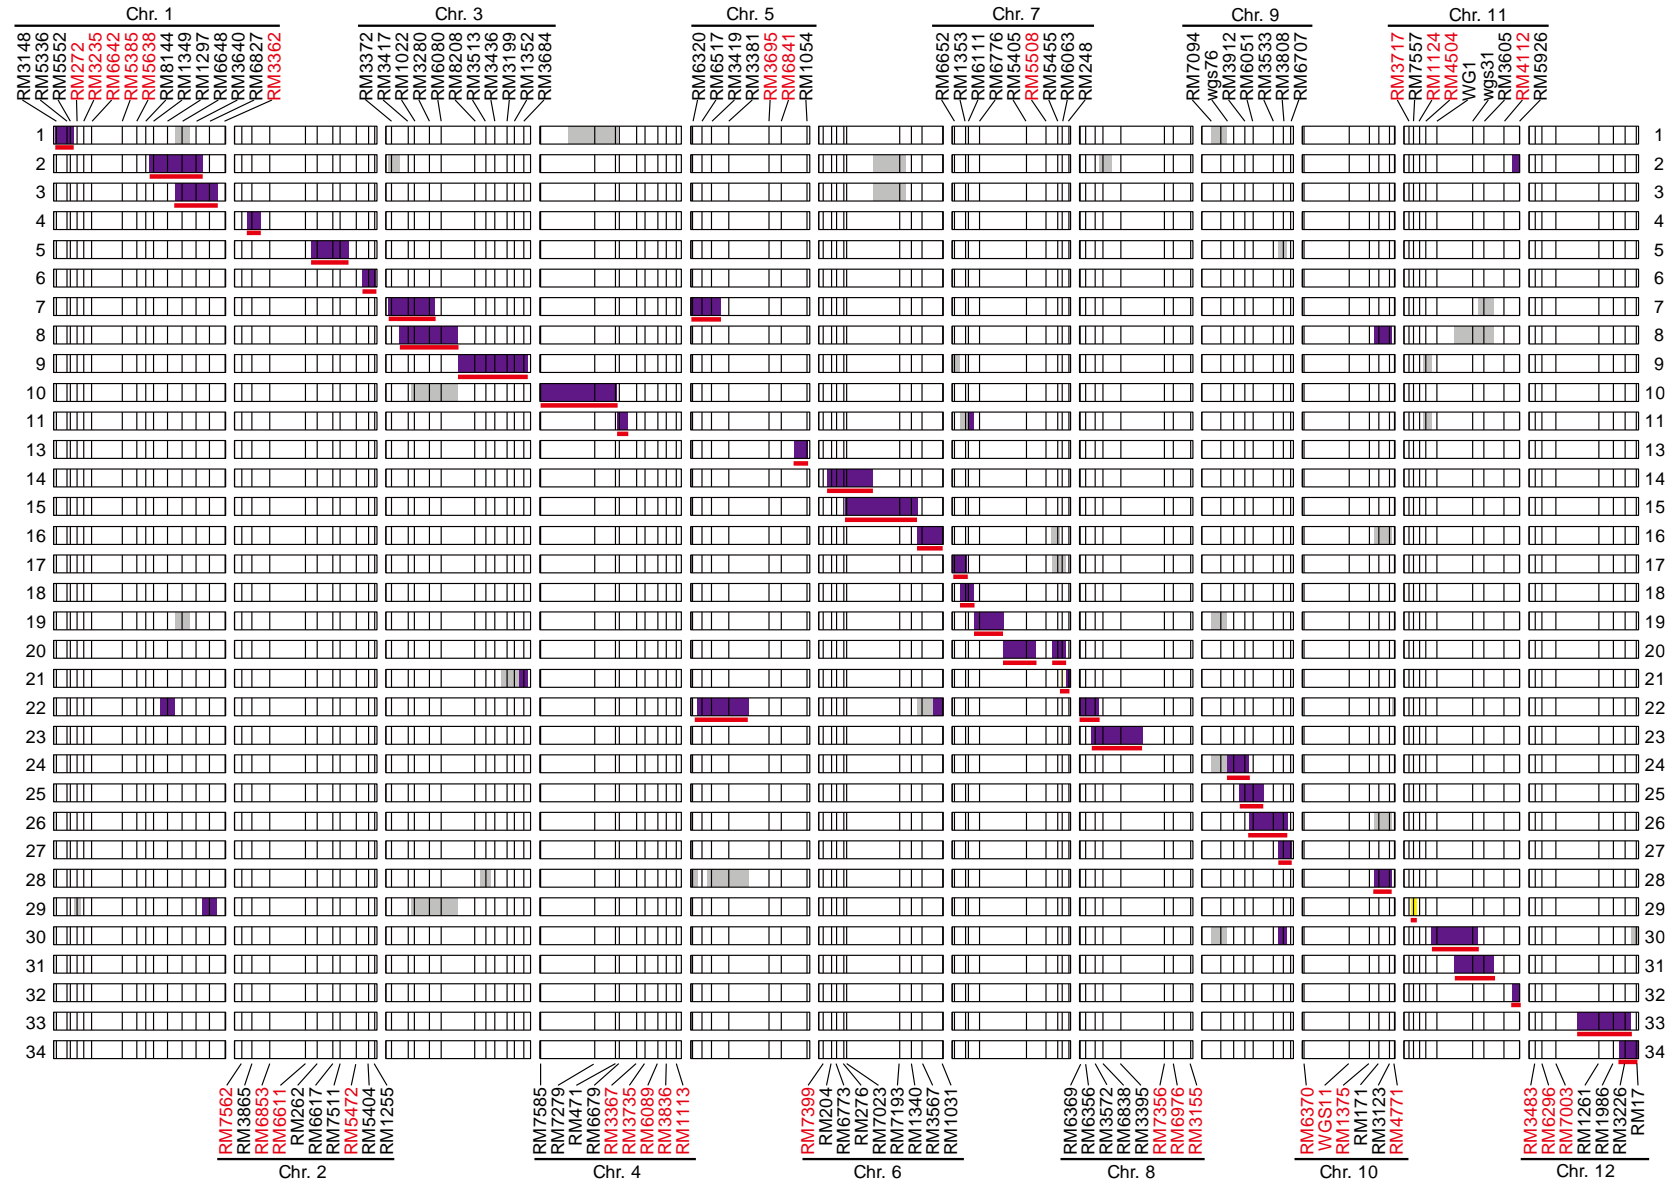

**Supplemental Fig. 3.** Graphical genotypes of WK56ILs.

Homozygous genotypes for WK56 or heterozygous genotypes were represented in purple or yellow, respectively. Missing genotypes at markers showing heterozygous genotypes at BC<sub>4</sub>F<sub>1</sub> generation are indicated by grey. The chromosome region for a minimal set of introgression for alien chromosomes indicated in red underlines were target for population maintenances. Names of markers at which alien chromosomal segment was not introgressed were shown in red.
